# Supplementary material for: Identification of the MAPK Cascade and its Relationship with Nitrogen Metabolism in the Green Alga Chlamydomonas reinhardtii
Source: PubMed Central journal article supplement (PMC7279229; doi:10.3390/ijms21103417), 2020-05-12
Supplement: ijms-21-03417-s001.pdf [file ijms-21-03417-s001.pdf]

**Table S1. Summary of the main characteristics of all the MAPK cascade members identified.** 17 MAPKs, 2 MAPKKs, 11MEKK-like, 94 RAF-like and 3 ZIK-like MAPKKKs were identified. The name, protein ID (NCBI) and gene (Phytozome), chromosomal location, gene length, ORF (open reading frame) length, CDS (coding sequences) length, number of exons, size are shown from left to right of the protein, its molecular weight and the isoelectric point (pI) determined with protparam (ExpASy), the location of the kinase domain in the amino acid sequence and, finally, the subcellular location, predicted from Cello2go.M (plasma membrane), E (extracellular), Cl (chloroplasic), N (nuclear), C (cytoplasmic), Mi (mitochondrial).

| Family (subfamily) | Name   | Protein ID (NCBI) | Gen ID (phytozome) | Chromosomal location | Gene length (bp) | ORF length (bp) | CDS length (bp) | Number of exons | Protein size (aa) | Molecular weight | pI   | Kinase domain location (aa) | Subcellular location |
|--------------------|--------|-------------------|--------------------|----------------------|------------------|-----------------|-----------------|-----------------|-------------------|------------------|------|-----------------------------|----------------------|
| MAPK               | MAPK1  | PNW84924          | Cre03.g164250      | 3041386              | 9374             | 7143            | 6285            | 11              | 2094              | 209,92           | 4,53 | 1496-1797                   | N                    |
|                    | MAPK2  | PNW80276          | Cre08.g385050      | 4906426              | 6897             | 4200            | 2223            | 12              | 740               | 79,02            | 8,61 | 151-488                     | N                    |
|                    | MAPK3  | XP_001690852      | Cre12.g509000      | 2119590              | 2446             | 1110            | 1062            | 8               | 383               | 43,03            | 6,65 | 45-381                      | C/ Mi/ N             |
|                    | MAPK4  | PNW71073          | Cre17.g745447      | 6855222              | 7528             | 5201            | 2298            | 9               | 765               | 81,21            | 7,2  | 60-400                      | N                    |
|                    | MAPK5  | XP_001699095      | Cre13.g607300      | 5094976              | 4412             | 2454            | 1302            | 11              | 433               | 48,54            | 8,88 | 6-343                       | C/ Mi/ N             |
|                    | MAPK6  | XP_001690850      | Cre12.g508900      | 2129460              | 3866             | 2690            | 1128            | 8               | 375               | 42,52            | 7,66 | 37-369                      | C/ Mi                |
|                    | MAPK7  | PNW71601          | Cre16.g661100      | 2519399              | 4622             | 2587            | 1758            | 7               | 585               | 63,32            | 9,7  | 4-283                       | N                    |
|                    | MAPK8  | XP_001700291      | Cre01.g010000      | 1838122              | 4166             | 2025            | 1170            | 10              | 389               | 43,86            | 5,68 | 52-389                      | C/ N                 |
|                    | MAPK9  | PNW88973          | Cre01.g052800      | 7342585              | 9116             | 5569            | 3462            | 12              | 1163              | 117,97           | 9,91 | 2-269                       | N                    |
|                    | MAPK10 | PNW88974          | Cre01.g052850      | 7356808              | 10268            | 7895            | 5199            | 7               | 1732              | 168,69           | 9,5  | 2-252                       | N                    |
|                    | MAPK11 | PNW87149          | Cre02.g111014      | 5820048              | 7742             | 5461            | 4212            | 9               | 1403              | 142,51           | 9,15 | 21-281                      | N                    |
|                    | MAPK12 | ALE15285          | Cre03.g169500      | 3709775              | 6332             | 4661            | 3321            | 7               | 1106              | 114,21           | 9,49 | 2-289                       | N                    |
|                    | MAPK13 | PNW85915          | Cre03.g200200      | 8184080              | 8704             | 7281            | 5301            | 6               | 1766              | 176,78           | 9,36 | 2-289                       | N                    |
|                    | MAPK14 | PNW77338          | Cre10.g432250      | 1948371              | 8496             | 6947            | 4752            | 6               | 1583              | 160,55           | 8,31 | 2-350                       | N                    |

|                  |        |              |               |         |       |       |      |    |      |        |      |           |        |
|------------------|--------|--------------|---------------|---------|-------|-------|------|----|------|--------|------|-----------|--------|
|                  | MAPK15 | PNW75720     | Cre12.g538300 | 6473633 | 5596  | 3795  | 1923 | 10 | 640  | 68,44  | 9,11 | 20-311    | N      |
|                  | MAPK16 | PNW70187     | Cre17.g709500 | 1790415 | 8269  | 5742  | 1078 | 10 | 1078 | 107,47 | 7,93 | 9-317     | N      |
|                  | MAPK17 | PNW70192     | Cre17.g709750 | 1821974 | 9617  | 8208  | 4956 | 6  | 1651 | 165,08 | 8,56 | 1-264     | N      |
| MAPKK            | MAPKK1 | XP_001696437 | Cre06.g249150 | 51943   | 4344  | 2216  | 1359 | 7  | 452  | 50,28  | 6,87 | 42-305    | C/ Mi  |
|                  | MAPKK2 | PNW73553     | Cre13.g563733 | 250093  | 4286  | 2657  | 1422 | 14 | 473  | 47,34  | 8,16 | 266-438   | N      |
|                  | MEKK1  | PNW88153     | Cre01.g016570 | 2796247 | 12436 | 5895  | 4575 | 18 | 1524 | 150,2  | 6,61 | 10-289    | N      |
|                  | MEKK2  | PNW86163     | Cre02.g075350 | 311027  | 4953  | 2881  | 1446 | 11 | 481  | 51,47  | 9,95 | 15-272    | N      |
|                  | MEKK3  | PNW86180     | Cre02.g076000 | 398374  | 6436  | 2575  | 1524 | 11 | 507  | 53,87  | 6,18 | 167-435   | N      |
|                  | MEKK4  | PNW84939     | Cre03.g164900 | 3111653 | 8583  | 3995  | 2838 | 15 | 945  | 97,18  | 5,84 | 35-301    | M/ Cl  |
|                  | MEKK5  | PNW80411     | Cre07.g316650 | 578795  | 12676 | 5707  | 3129 | 24 | 1042 | 111,56 | 8,78 | 509-857   | Mi/ Cl |
| MAPKKK<br>(MEKK) | MEKK6  | PNW80428     | Cre07.g317300 | 666135  | 6816  | 3574  | 2313 | 14 | 770  | 77,8   | 6,48 | 10-265    | M/ N   |
|                  | MEKK7  | PNW78821     | Cre09.g391245 | 3739567 | 6446  | 4603  | 3171 | 9  | 1056 | 105,22 | 7,26 | 21-271    | M/ N   |
|                  | MEKK8  | PNW79200     | Cre09.g405900 | 6180085 | 13190 | 11042 | 9672 | 10 | 3223 | 319,55 | 5,93 | 466-712   | N      |
|                  | MEKK9  | PNW76185     | Cre12.g544400 | 8905993 | 6640  | 4404  | 2760 | 11 | 919  | 89,24  | 6,49 | 7-285     | N      |
|                  | MEKK10 | PNW76037     | Cre12.g550300 | 8249636 | 10362 | 7237  | 6756 | 12 | 2251 | 222,05 | 8,62 | 28-296    | N      |
|                  | MEKK11 | PNW74390     | Cre13.g606600 | 4985136 | 5702  | 4858  | 4206 | 7  | 1401 | 142,06 | 8,75 | 351-548   | N      |
|                  | RAF1   | PNW87799     | Cre01.g002550 | 445086  | 6553  | 3595  | 1182 | 8  | 393  | 42,89  | 7,57 | 83-354    | C/ Mi  |
| MAPKKK<br>(RAF)  | RAF2   | PNW87836     | Cre01.g003800 | 726049  | 10442 | 8169  | 6942 | 8  | 2313 | 223,37 | 8,82 | 412-569   | N      |
|                  | RAF3   | PNW88041     | Cre01.g011800 | 2154460 | 8416  | 5100  | 3993 | 16 | 1330 | 135,57 | 6,35 | 1082-1321 | E/ N   |
|                  | RAF4   | PNW88042     | Cre01.g011850 | 2162976 | 9882  | 5927  | 3984 | 16 | 1327 | 135,01 | 6,34 | 1081-1320 | M/ N   |

|       |              |               |         |       |       |       |    |      |        |      |                         |          |
|-------|--------------|---------------|---------|-------|-------|-------|----|------|--------|------|-------------------------|----------|
| RAF5  | PNW88330     | Cre01.g024750 | 3819867 | 12586 | 9189  | 7890  | 24 | 2629 | 271,96 | 5,69 | 2341-2595               | E/ N     |
| RAF6  | PNW88608     | Cre01.g036900 | 5276708 | 9135  | 5312  | 2844  | 14 | 947  | 98,96  | 5,82 | 630-934                 | E/ M/ N  |
| RAF7  | PNW88718     | Cre01.g041550 | 5816648 | 6773  | 5623  | 2856  | 5  | 951  | 91,94  | 6,42 | 54-150 669-859          | N        |
| RAF8  | PNW88814     | Cre01.g045600 | 6392567 | 7616  | 2513  | 1998  | 17 | 665  | 70,85  | 6,54 | 133-397                 | Mi       |
| RAF9  | PNW86144     | Cre02.g074850 | 250404  | 5926  | 4370  | 1671  | 7  | 556  | 58,52  | 8,89 | 200-479                 | N        |
| RAF10 | XP_001701841 | Cre02.g075900 | 379966  | 5145  | 2423  | 1227  | 11 | 408  | 45,6   | 6,88 | 19-301                  | C/ Mi/ N |
| RAF11 | PNW86537     | Cre02.g090700 | 2322421 | 12416 | 8235  | 7920  | 16 | 2639 | 255,14 | 7,28 | 2336-2594               | N        |
| RAF12 | PNW86746     | Cre02.g095129 | 3546432 | 9678  | 5007  | 3486  | 13 | 1161 | 118,3  | 8,86 | 842-1113                | N        |
| RAF13 | PNW87185     | Cre02.g112333 | 6011184 | 6162  | 5043  | 2982  | 6  | 993  | 101,44 | 9,08 | 681-961                 | M/ N     |
| RAF14 | PNW87190     | Cre02.g112500 | 6026336 | 6172  | 4888  | 2820  | 7  | 939  | 96,27  | 9,36 | 659-925                 | N        |
| RAF15 | PNW87213     | Cre02.g113600 | 6154135 | 5741  | 4040  | 2478  | 10 | 825  | 89,91  | 8,95 | 450-717                 | N        |
| RAF16 | PNW84391     | Cre03.g144011 | 112790  | 19766 | 13774 | 12096 | 22 | 4031 | 391,21 | 9,09 | 1986-2048;<br>2238-2475 | N        |
| RAF17 | PNW84416     | Cre03.g144464 | 254796  | 10582 | 8392  | 6639  | 11 | 2212 | 222,84 | 7,23 | 1516-1817               | N        |
| RAF18 | PNW84612     | Cre03.g151300 | 1431578 | 8446  | 4249  | 2745  | 15 | 914  | 93,05  | 7,76 | 537-850                 | M        |
| RAF19 | PNW84795     | Cre03.g159016 | 2402996 | 9645  | 4948  | 2907  | 20 | 968  | 100,98 | 6,41 | 690-939                 | M/ N     |
| RAF20 | PNW84801     | Cre03.g159150 | 2418801 | 8690  | 4836  | 2859  | 22 | 952  | 99,78  | 6,48 | 687-945                 | M/ N     |
| RAF21 | PNW85039     | Cre03.g169100 | 3671907 | 5977  | 4973  | 3393  | 6  | 1130 | 114,53 | 9,71 | 151-368                 | N        |
| RAF22 | PNW85396     | Cre03.g184450 | 5367591 | 4648  | 3613  | 1866  | 8  | 621  | 67,23  | 6,3  | 63-331                  | N        |
| RAF23 | XP_001693326 | Cre03.g205950 | 7421375 | 5925  | 4356  | 1539  | 6  | 512  | 54,87  | 8,99 | 166-433                 | N        |

|       |              |               |         |       |       |      |    |      |        |       |                            |          |
|-------|--------------|---------------|---------|-------|-------|------|----|------|--------|-------|----------------------------|----------|
| RAF24 | XP_001699403 | Cre03.g209505 | 8986322 | 4924  | 2893  | 846  | 5  | 312  | 35,81  | 7,64  | 3-268                      | C/ Mi/ N |
| RAF25 | PNW84074     | Cre04.g220000 | 2201172 | 20466 | 10261 | 8424 | 24 | 2807 | 261,46 | 10,73 | 46-144; 295-338; 2505-2603 | N        |
| RAF26 | PNW84283     | Cre04.g228208 | 3529518 | 6586  | 4718  | 3351 | 10 | 1116 | 113,32 | 8,08  | 821-1102                   | N        |
| RAF27 | PNW84286     | Cre04.g228300 | 3540468 | 8426  | 6572  | 3660 | 8  | 1219 | 123,04 | 9,31  | 906-1189                   | N        |
| RAF28 | PNW84299     | Cre04.g228800 | 3649997 | 8388  | 5881  | 2538 | 8  | 845  | 84,13  | 9,03  | 453-740                    | M/ N     |
| RAF29 | PNW84300     | Cre04.g228850 | 3658847 | 9703  | 8103  | 6261 | 7  | 2086 | 208,72 | 7,04  | 1626-1845; 2031-2069       | N        |
| RAF30 | PNW83575     | Cre05.g235450 | 2454358 | 5939  | 3101  | 1965 | 12 | 654  | 69,2   | 5,45  | 225-493                    | N        |
| RAF31 | PNW82378     | Cre06.g278265 | 4349283 | 6243  | 4464  | 3471 | 10 | 1156 | 118,73 | 8,4   | 833-1138                   | N        |
| RAF32 | XP_001701605 | Cre06.g292700 | 6447570 | 4589  | 2294  | 1119 | 10 | 372  | 41,25  | 6,64  | 14-278                     | C/ Mi/ N |
| RAF33 | PNW82768     | Cre06.g293300 | 6524617 | 10730 | 8168  | 4986 | 10 | 1661 | 164,06 | 8,97  | 110-157; 489-693           | N        |
| RAF34 | PNW80504     | Cre07.g320050 | 1101146 | 8133  | 5674  | 3591 | 14 | 1196 | 121,8  | 5,84  | 928-1155                   | M        |
| RAF35 | PNW80614     | Cre07.g324932 | 1601084 | 7632  | 6506  | 4035 | 4  | 1344 | 129,69 | 6,67  | 20-112                     | N        |
| RAF36 | PNW80665     | Cre07.g325739 | 1880192 | 11746 | 6909  | 5886 | 22 | 1961 | 196,49 | 5,38  | 1612-1872                  | M/ N     |
| RAF37 | XP_001690456 | Cre07.g328850 | 2419195 | 7439  | 3406  | 2082 | 16 | 693  | 72,23  | 5,79  | 4-260                      | C/ N     |
| RAF38 | PNW81253     | Cre07.g348450 | 5176903 | 4142  | 3394  | 1242 | 5  | 413  | 45,43  | 7,99  | 70-349                     | Mi       |
| RAF39 | XP_001692604 | Cre07.g351150 | 5523427 | 3936  | 2711  | 1857 | 7  | 618  | 66,62  | 9,34  | 17-278                     | N        |
| RAF40 | PNW79609     | Cre08.g359900 | 623303  | 11281 | 8521  | 5607 | 10 | 1868 | 183,11 | 8,26  | 11-278                     | N        |
| RAF41 | PNW79945     | Cre08.g373300 | 2692638 | 5823  | 3787  | 2844 | 16 | 947  | 98,04  | 8,77  | 488-744                    | M/ N     |
| RAF42 | PNW80223     | Cre08.g382800 | 4548983 | 8175  | 3290  | 2061 | 14 | 686  | 75,76  | 5,78  | 131-396                    | C/ Mi/ N |

|       |              |               |         |       |      |      |    |      |        |      |                         |          |
|-------|--------------|---------------|---------|-------|------|------|----|------|--------|------|-------------------------|----------|
| RAF43 | PNW80273     | Cre08.g384900 | 4886273 | 3825  | 1774 | 903  | 8  | 300  | 33,48  | 6,76 | 54-293                  | C/ Mi/ N |
| RAF44 | PNW78786     | Cre09.g390097 | 3575016 | 10188 | 6634 | 5439 | 23 | 1812 | 186,47 | 6,21 | 1076-1139;<br>1410-1577 | E/ M/ N  |
| RAF45 | PNW78787     | Cre09.g390134 | 3585533 | 8831  | 5484 | 4098 | 20 | 1365 | 144,97 | 6,17 | 861-1251                | M        |
| RAF46 | PNW79090     | Cre09.g400330 | 5483547 | 8491  | 5366 | 3372 | 12 | 1123 | 113,64 | 9,33 | 58-325                  | N        |
| RAF47 | PNW78274     | Cre09.g404050 | 513690  | 14532 | 8762 | 7017 | 27 | 2338 | 231,73 | 6,29 | 1722-2013               | N        |
| RAF48 | PNW79373     | Cre09.g412750 | 7279600 | 12979 | 5410 | 4170 | 25 | 1389 | 139,96 | 8,41 | 3-225                   | N        |
| RAF49 | XP_001690509 | Cre10.g443300 | 3275379 | 5032  | 3184 | 2439 | 12 | 812  | 88     | 8,43 | 3-260                   | N        |
| RAF50 | PNW77652     | Cre10.g445700 | 3645177 | 9172  | 7920 | 6096 | 9  | 2031 | 204,73 | 7,01 | 357-413;<br>739-934     | N        |
| RAF51 | PNW78079     | Cre10.g463500 | 6084346 | 7572  | 5980 | 2958 | 9  | 985  | 99,79  | 8,73 | 666-943                 | N        |
| RAF52 | PNW78080     | Cre10.g463550 | 6093116 | 6642  | 5364 | 2475 | 7  | 824  | 84,63  | 9,02 | 502-809                 | M/ N     |
| RAF53 | PNW78096     | Cre10.g464100 | 6170561 | 4585  | 3645 | 2664 | 7  | 887  | 92,88  | 8,11 | 121-384                 | N        |
| RAF54 | XP_001701400 | Cre11.g467584 | 419312  | 4675  | 3619 | 2082 | 5  | 1393 | 151,11 | 5,31 | 684-963;<br>1099-1383   | M/ C     |
| RAF55 | XP_001698779 | Cre11.g467585 | 424042  | 4563  | 2829 | 1512 | 4  | 570  | 60,32  | 6,07 | 197-368;<br>389-560     | M/ Cl    |
| RAF56 | PNW76439     | Cre11.g467586 | 430502  | 4460  | 3744 | 585  | 4  | 585  | 60,89  | 4,95 | 404-575                 | M/ N     |
| RAF57 | PNW76441     | Cre11.g467588 | 439960  | 6112  | 5049 | 2001 | 5  | 666  | 69,46  | 5,1  | 485-656                 | M/ Cl/ N |
| RAF58 | PNW76442     | Cre11.g467589 | 446121  | 6091  | 5035 | 2001 | 5  | 666  | 69,45  | 5,06 | 485-656                 | M/ Cl/ N |
| RAF59 | PNW76806     | Cre11.g477000 | 2718724 | 8114  | 3390 | 2013 | 11 | 670  | 69,64  | 7,83 | 17-392                  | N        |
| RAF60 | PNW76909     | Cre11.g481000 | 3434420 | 5331  | 2303 | 1098 | 9  | 365  | 41,1   | 8,25 | 13-277                  | C/ Mi/ N |
| RAF61 | PNW74603     | Cre12.g490800 | 1081687 | 11319 | 7352 | 5181 | 17 | 1726 | 169,37 | 6,26 | 1346-1649               | N        |

|       |              |               |         |       |      |      |    |      |        |      |                      |          |
|-------|--------------|---------------|---------|-------|------|------|----|------|--------|------|----------------------|----------|
| RAF62 | XP_001702346 | Cre12.g498650 | 3229809 | 5607  | 4590 | 2157 | 4  | 718  | 77,03  | 9,16 | 323-589              | N        |
| RAF63 | PNW74924     | Cre12.g504250 | 2653553 | 9212  | 6101 | 3704 | 15 | 1237 | 127,41 | 6,12 | 644-667;<br>948-1214 | N        |
| RAF64 | PNW75452     | Cre12.g527000 | 5121746 | 4876  | 3880 | 2613 | 6  | 870  | 92,12  | 6,78 | 109-380              | Cl/ N    |
| RAF65 | XP_001696965 | Cre12.g529550 | 5352264 | 4814  | 3038 | 2310 | 13 | 769  | 80,25  | 9,68 | 36-303               | N        |
| RAF66 | PNW73628     | Cre13.g566450 | 699683  | 6736  | 3794 | 1620 | 11 | 539  | 57,48  | 6,9  | 186-499              | N        |
| RAF67 | PNW73650     | Cre13.g567200 | 818679  | 12619 | 6697 | 3939 | 22 | 1312 | 134,71 | 6,4  | 910-1169             | N        |
| RAF68 | PNW73945     | Cre13.g579200 | 2333838 | 7849  | 4692 | 3006 | 8  | 1001 | 98,77  | 9    | 683-936              | N        |
| RAF69 | PNW74069     | Cre13.g584100 | 2975154 | 9040  | 5866 | 3675 | 13 | 1224 | 125,37 | 6,87 | 837-1200             | E/ N     |
| RAF70 | PNW74305     | Cre13.g603600 | 4474934 | 10146 | 5379 | 3399 | 17 | 1132 | 113,4  | 6,21 | 822-1110             | N        |
| RAF71 | PNW74332     | Cre13.g604350 | 4667795 | 10390 | 5485 | 4107 | 18 | 1368 | 133,91 | 6,92 | 841-1127             | N        |
| RAF72 | PNW72926     | Cre14.g612000 | 600655  | 10262 | 6555 | 4221 | 23 | 1406 | 149,32 | 5,63 | 3-256                | M/ N     |
| RAF73 | PNW73252     | Cre14.g625050 | 2479381 | 9062  | 5512 | 3615 | 18 | 1204 | 121,39 | 7,99 | 954-1188             | M/ N     |
| RAF74 | PNW71449     | Cre16.g654850 | 1717261 | 8561  | 4357 | 2748 | 20 | 915  | 95,56  | 5,82 | 599-901              | E/ M     |
| RAF75 | PNW71450     | Cre16.g654900 | 1725871 | 8756  | 4464 | 2496 | 21 | 831  | 87,74  | 5,55 | 521-819              | M        |
| RAF76 | PNW71561     | Cre16.g659400 | 2313335 | 5179  | 3264 | 1677 | 10 | 558  | 61,32  | 6,02 | 283-526              | C/ Mi    |
| RAF77 | PNW72330     | Cre16.g672602 | 6541417 | 5762  | 4482 | 1989 | 9  | 662  | 69,55  | 9,27 | 314-586              | M/ Cl/ N |
| RAF78 | PNW72306     | Cre16.g673600 | 6415157 | 7039  | 5588 | 1899 | 8  | 632  | 64,51  | 8,16 | 364-628              | M/ N     |
| RAF79 | PNW72379     | Cre16.g674065 | 6774858 | 3855  | 3338 | 1299 | 4  | 432  | 45,72  | 8,44 | 109-389              | Mi/ Cl   |
| RAF80 | PNW72380     | Cre16.g674179 | 6781133 | 3895  | 2992 | 1440 | 5  | 479  | 50,61  | 7,18 | 157-437              | Cl       |
| RAF81 | PNW72381     | Cre16.g674291 | 6785082 | 5246  | 4310 | 1740 | 6  | 579  | 60,35  | 9,63 | 268-561              | N        |

|                 |       |              |               |         |       |      |      |    |      |        |      |           |          |
|-----------------|-------|--------------|---------------|---------|-------|------|------|----|------|--------|------|-----------|----------|
|                 | RAF82 | PNW72402     | Cre16.g676309 | 6869955 | 7013  | 5206 | 2232 | 8  | 743  | 76,5   | 6,91 | 244-527   | N        |
|                 | RAF83 | PNW72071     | Cre16.g683650 | 5136056 | 5002  | 2505 | 1797 | 11 | 598  | 62,44  | 6,05 | 237-498   | Mi       |
|                 | RAF84 | PNW72507     | Cre16.g686734 | 7453925 | 7009  | 4965 | 2367 | 6  | 788  | 81,05  | 9,54 | 454-751   | N        |
|                 | RAF85 | XP_001691957 | Cre16.g687800 | 4597497 | 7923  | 5473 | 4071 | 16 | 2001 | 209,62 | 5,7  | 1046-1330 | M/ N     |
|                 | RAF86 | PNW71175     | Cre16.g694550 | 230523  | 7529  | 5431 | 2772 | 12 | 923  | 96,76  | 7,05 | 678-896   | M        |
|                 | RAF87 | PNW69889     | Cre17.g696900 | 93230   | 10646 | 6319 | 5547 | 26 | 1848 | 187,52 | 5,73 | 1563-1835 | E/ N     |
|                 | RAF88 | PNW69890     | Cre17.g696950 | 104087  | 11019 | 6783 | 5382 | 25 | 1793 | 182,57 | 6,03 | 1508-1780 | E/ M/ N  |
|                 | RAF89 | PNW69969     | Cre17.g700133 | 605270  | 6517  | 3652 | 2202 | 9  | 733  | 77,23  | 9,15 | 246-512   | N        |
|                 | RAF90 | PNW70274     | Cre17.g713025 | 2173220 | 7466  | 3682 | 2937 | 15 | 978  | 101,56 | 6,15 | 732-963   | M/ N     |
|                 | RAF91 | XP_001700457 | Cre17.g713750 | 2278537 | 4266  | 3298 | 2022 | 5  | 673  | 70,07  | 5,15 | 492-663   | M/ Cl/ N |
|                 | RAF92 | PNW70426     | Cre17.g719450 | 2867092 | 8488  | 4482 | 2343 | 12 | 780  | 82,23  | 9,25 | 341-609   | N        |
|                 | RAF93 | PNW70838     | Cre17.g735550 | 5178500 | 5900  | 4698 | 3045 | 7  | 1014 | 103,55 | 6,61 | 29-297    | M/ N     |
|                 | RAF94 | PNW70853     | Cre17.g736250 | 5293730 | 11252 | 4870 | 3195 | 14 | 1064 | 107,68 | 5,49 | 820-1037  | M/ N     |
| MAPKKK<br>(ZIK) | ZIK1  | XP_001690141 | Cre01.g040150 | 5637823 | 4961  | 3742 | 2391 | 10 | 864  | 96,86  | 5,7  | 17-278    | N, M     |
|                 | ZIK2  | PNW88681     | Cre01.g040200 | 5644051 | 5981  | 3646 | 2595 | 9  | 796  | 83,02  | 5,37 | 19-279    | N        |
|                 | ZIK3  | PNW69970     | Cre17.g700166 | 612184  | 9473  | 6107 | 4794 | 12 | 1597 | 160,43 | 6,17 | 27-285    | N        |

**Table S2. Main consensus motif in the MAPK cascades of *Chlamydomonas*.** Four motives are shown: loop P, C, T and the CDD domain. A consensus sequence and a conserved sequence are generated from the four MAPK groups, except for the CDD, which conserved sequence is specific to the established MAPK group. In brackets, is shown the number of proteins included in each group and showing that particular consensus sequence.

|                            | P loop                                                                                                                                                     | C loop                                                                                  | T loop                                                                                                                          | CDD                                                                                                                                                                                                                                                                                                                                                                     |
|----------------------------|------------------------------------------------------------------------------------------------------------------------------------------------------------|-----------------------------------------------------------------------------------------|---------------------------------------------------------------------------------------------------------------------------------|-------------------------------------------------------------------------------------------------------------------------------------------------------------------------------------------------------------------------------------------------------------------------------------------------------------------------------------------------------------------------|
| MAPK C (3)                 | GKGA <sub>F</sub> YGVV <sub>A</sub> CSAK <sub>R</sub> N <sub>T</sub> Y <sub>K</sub> NG                                                                     | NYL <sub>H</sub> HRDLKPSNLL <sub>L</sub>                                                | FMTE <sub>V</sub> VVTRWYRAPELLLS <sub>C</sub> <sup>ST</sup> <sub>SG</sub>                                                       | RKLE <sub>P</sub> EA <sub>D</sub> PLALDLMEKMLQ <sub>F</sub> DP <sub>R</sub> KRI <sub>P</sub> V <sub>L</sub> QAL <sub>K</sub> HPWLAQL <sub>H</sub> DEAAEP <sub>S</sub>                                                                                                                                                                                                   |
| MAPK D (2)                 | GKGS <sub>Y</sub> G <sub>Y</sub> VC                                                                                                                        | V <sub>F</sub> HRDLKPKNILA                                                              | F <sub>W</sub> T <sub>D</sub> V <sub>A</sub> TRWYRAPELGG <sub>S</sub> F                                                         | FP <sub>R</sub> AP <sub>S</sub> ALD <sub>L</sub> RL <sub>L</sub> LF <sub>D</sub> PA <sub>K</sub> R <sub>P</sub> TAE <sub>E</sub> ALAH <sub>P</sub> YEA <sub>G</sub> HL <sub>H</sub> <sub>Q</sub>                                                                                                                                                                        |
| MAPK E (10)                | GEGAYGVV <sub>A</sub> CR <sub>R</sub> PK <sub>K</sub> TG                                                                                                   | YY <sub>H</sub> RD <sub>L</sub> KPAN <sub>L</sub> LY                                    | T <sub>S</sub> VV <sub>T</sub> TRWYRAPEV <sub>L</sub> Y                                                                         | L <sub>R</sub> Q <sub>R</sub> L <sub>P</sub> E <sub>Y</sub> E <sub>P</sub> R <sub>L</sub> L <sub>L</sub> Y <sub>A</sub> C <sub>D</sub> DP <sub>R</sub> R <sub>P</sub> TAE <sub>E</sub> L <sub>L</sub> Q <sub>M</sub> P <sub>Y</sub> F <sub>D</sub> Y <sub>E</sub>                                                                                                       |
| MAPK CONSENSUS             | GKGA <sub>F</sub> YGVV <sub>A</sub> CSAK <sub>R</sub> N <sub>T</sub> Y <sub>K</sub> NG                                                                     | NYL <sub>H</sub> HRDLKPAN <sub>L</sub> LY                                               | T <sub>S</sub> VV <sub>T</sub> TRWYRAPEV <sub>L</sub> Y                                                                         | R <sub>K</sub> L <sub>E</sub> P <sub>E</sub> A <sub>D</sub> P <sub>L</sub> A <sub>L</sub> D <sub>L</sub> M <sub>E</sub> K <sub>M</sub> L <sub>Q</sub> F <sub>D</sub> P <sub>R</sub> K <sub>R</sub> I <sub>P</sub> V <sub>L</sub> Q <sub>A</sub> L <sub>K</sub> H <sub>P</sub> W <sub>L</sub> A <sub>Q</sub> L <sub>H</sub> D <sub>E</sub> A <sub>A</sub> E <sub>P</sub> |
| MAPK CONSERVED             | -GxGxYGxVxx(A/C)-                                                                                                                                          | -HRDxKPxNxL-                                                                            | -TxYVxTRWYRAPE(V/L)-                                                                                                            | ---                                                                                                                                                                                                                                                                                                                                                                     |
| MAPKK CONSENSUS (2)        | ---                                                                                                                                                        | L <sub>K</sub> M <sub>V</sub> HRDIKPSN <sub>L</sub> LM                                  | N <sub>L</sub> I <sub>W</sub> Y <sub>G</sub> T <sub>V</sub> T <sub>Y</sub> MSPERIN <sub>N</sub> Q <sub>S</sub> Y <sub>S</sub> F | F <sub>S</sub> E <sub>A</sub> F <sub>C</sub> D <sub>F</sub> V <sub>R</sub> Y <sub>S</sub> L <sub>Q</sub> K <sub>D</sub> P <sub>H</sub> K <sub>R</sub> P <sub>S</sub> Y <sub>T</sub> Q                                                                                                                                                                                   |
| MAPKK CONSERVED            | ---                                                                                                                                                        | -VHRDIKPxNxL-                                                                           | -GTVTYMSPERIxxxxYSF-                                                                                                            | ---                                                                                                                                                                                                                                                                                                                                                                     |
| MAPKKK MEKK CONSENSUS (12) | L <sub>G</sub> G <sub>S</sub> F <sub>G</sub> V <sub>Y</sub> KA                                                                                             | HRD <sub>L</sub> K <sub>N</sub> LL <sub>L</sub>                                         | X <sub>G</sub> T <sub>P</sub> W <sub>Y</sub> MAPEV <sub>L</sub>                                                                 | L <sub>R</sub> P <sub>L</sub> Y <sub>A</sub> CLAP <sub>P</sub> A <sub>R</sub> P <sub>S</sub> A <sub>L</sub> L <sub>L</sub> H                                                                                                                                                                                                                                            |
| MAPKKK MEKK CONSERVED      | -GxGxxGxV-                                                                                                                                                 | -HRDxKxxN-                                                                              | -G(T/S)PxxMAPEV-                                                                                                                | ---                                                                                                                                                                                                                                                                                                                                                                     |
| MAPKKK RAF A (25)          | Y <sub>K</sub> G <sub>S</sub> S <sub>A</sub> V <sub>Y</sub> KA <sub>T</sub> C <sub>R</sub> SG <sub>L</sub> V <sub>A</sub> L <sub>K</sub> V                 | HRDIKPEN <sub>L</sub> LET                                                               | ERAV <sub>T</sub> RAGT <sub>L</sub> YMAPEV <sub>E</sub> RC                                                                      | AR <sub>D</sub> F <sub>L</sub> A <sub>A</sub> L <sub>A</sub> P <sub>P</sub> R <sub>P</sub> R <sub>P</sub> T <sub>A</sub> Q <sub>L</sub> L <sub>L</sub> HP <sub>W</sub> L                                                                                                                                                                                                |
| MAPKKK RAF B (7)           | Y <sub>F</sub> R <sub>L</sub> G <sub>E</sub> G <sub>A</sub> FG <sub>T</sub> V <sub>L</sub> K <sub>C</sub> R <sub>K</sub> K <sub>T</sub> G <sub>S</sub> (3) | Y <sub>L</sub> H <sub>S</sub> Y <sub>H</sub> RD <sub>L</sub> KPEN <sub>L</sub> LY       | X <sub>G</sub> T <sub>P</sub> W <sub>Y</sub> MAPEV <sub>L</sub>                                                                 | CLAP <sub>P</sub> A <sub>R</sub> P <sub>S</sub> Y <sub>L</sub>                                                                                                                                                                                                                                                                                                          |
| MAPKKK RAF C (7)           | KEY <sub>Y</sub> SG <sub>Y</sub> ASIV <sub>V</sub> Y <sub>A</sub> T                                                                                        | HL <sub>L</sub> SS <sub>Q</sub> Y <sub>I</sub> NGDLK <sub>P</sub> AN <sub>V</sub> LL(2) | ERP <sub>V</sub> IR <sub>X</sub> GTLDYMAPEV <sub>L</sub>                                                                        | D <sub>F</sub> I <sub>R</sub> R <sub>A</sub> L <sub>L</sub> K <sub>K</sub> P <sub>P</sub> R <sub>R</sub> P <sub>T</sub> Y <sub>A</sub> A <sub>L</sub> L <sub>L</sub> HP <sub>W</sub> Y                                                                                                                                                                                  |



|                                 |                                                                                  |                              |                                                                                |                                                  |
|---------------------------------|----------------------------------------------------------------------------------|------------------------------|--------------------------------------------------------------------------------|--------------------------------------------------|
| MAPKKK RAF<br>D (6)             |                                                                                  |                              | <br>T Y T G T P Y Y M A P E L G (3)<br>Y G T F Y Y M A P E (3)                 |                                                  |
| MAPKKK RAF<br>E (20)            | <br>G E F G S V Y R G T V R G S F V A V K (11)                                   |                              | <br>G T F Y Y M A P E (3)                                                      | <br>R C W A P P R P S E A F Y Y R L L L L L (15) |
| MAPKKK RAF<br>F (4)             |                                                                                  |                              |                                                                                |                                                  |
| MAPKKK RAF<br>G (6)             |                                                                                  |                              |                                                                                |                                                  |
| MAPKKK RAF<br>H (20)            |                                                                                  |                              |                                                                                |                                                  |
| MAPKKK RAF<br>CONSENSUS<br>(94) | <br>L G S G S F G R V Y G S V G V A V K (32)<br>Y K G S S V Y A C S G V A K (26) | <br>Y H R D L K P N Y L (91) | <br>E R A V T R A G T P Y M A P E V E R C P L K (27)<br>G T F Y Y M A P E (62) | <br>L Y S S S P P P P P P A A E Y Y K L (93)     |
| MAPKKK RAF<br>CONSERVED         | -GxGxxGRVxxGxxxGxxVAVK-                                                          | -HRDxKPxNxL-                 | -GTxxYMAPE-                                                                    | ---                                              |
| MAPKKK ZIK<br>CONSENSUS         |                                                                                  |                              |                                                                                |                                                  |
| MAPKKK ZIK<br>CONSERVED         | -GxGAXKxVxxAFD-                                                                  | -HRDLKCDNIF-                 | -GTPEFMAPE-                                                                    | ---                                              |

**Table S3. Primers lists**

| GENE                                               | NAME          | PRIMERS                        | OPT.T |
|----------------------------------------------------|---------------|--------------------------------|-------|
| <i>CreMAPK8</i><br>( <i>Cre01.g010000</i> )        | RTcrMPK8-F    | S: TCCCCAGTCTGCGGAAGAGCC       | 69 °C |
|                                                    | RTcrMPK8-R    | AS: AAGAGGCTGCCGCAAACCAGG      |       |
| <i>CreMAPK6</i><br>( <i>Cre12.g508900</i> )        | RTcrMPK6-F    | S: ATCAAGGCGATCGGCAAAGGAG      | 66 °C |
|                                                    | RTcrMPK6-R    | AS: TCCGTGCGTCAATCAGTTCTC      |       |
| <i>CreMAPK3</i><br>( <i>Cre12.g509000</i> )        | RTcrMPK3-F    | S: CAACATCATCGCCGTGAAGGAC      | 63 °C |
|                                                    | RTcrMPK3-R    | AS: CTGAAAGTGTTTCGTTTGTGAGTGG  |       |
| <i>CreMAPK5</i><br>( <i>Cre13.g607300</i> )        | RTcrMPK5-F    | S: GGCCTACGGAGTTGTATGGAAAGC    | 66 °C |
|                                                    | RTcrMPK5-R    | AS: CACTTCTCGAAATGTTTCGCTGTGC  |       |
| <i>CreMAPKK1</i><br>( <i>Cre06.g249150</i> )       | RTcrMEK1F3    | S: CTGGCTTGTTGTCCTTCTACG       | 66°C  |
|                                                    | RTcrMEK1R3    | AS: GGGATCTTGCCACCTTGG         |       |
| <i>CreMAPKKK RAF2</i><br>( <i>Cre01.g003800</i> )  | RTcr1M3K3800F | S: GCTGATGACGGCGCTGGACAT       | 66°C  |
|                                                    | RTcr1M3K3800R | AS: GCGACAGACCGAAATCAGTGATCTTG |       |
| <i>CreMAPKKK RAF14</i><br>( <i>Cre02.g112500</i> ) | RTcr2M3K2500F | S: GAATGAGGACCAGGCGCAGAGGCT    | 63°C  |
|                                                    | RTcr2M3K2500R | AS: GCACCAGTCAGCCGTGAACAGG     |       |
| <i>CreMAPKKK RAF79</i><br>( <i>Cre16.g674065</i> ) | RTcr16M3K4065 | S: CAGCATCTCCAGGCGCCTCTACAA    | 63°C  |
|                                                    | RTcr16M3K4065 | AS: GGATCTCAATCTCACGTTGAGCATGT |       |

Supplemental Figures

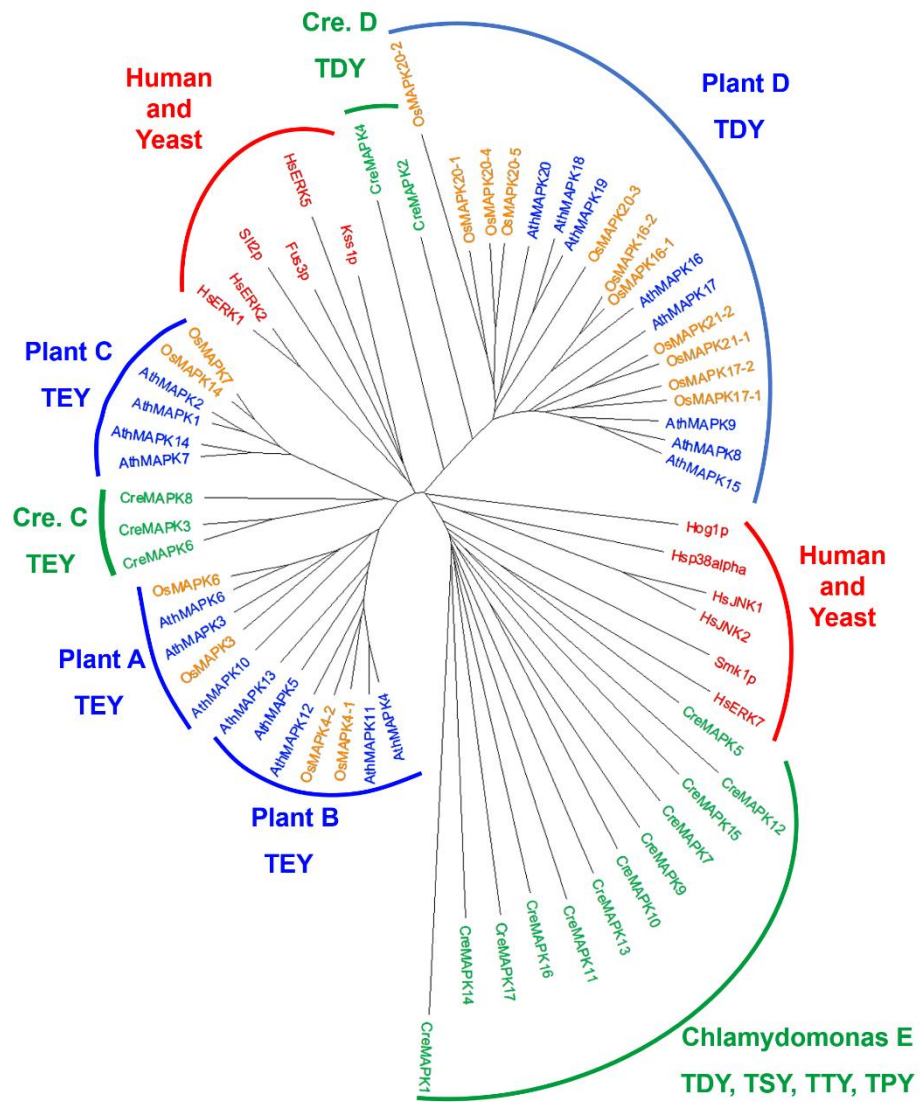

Figure S1

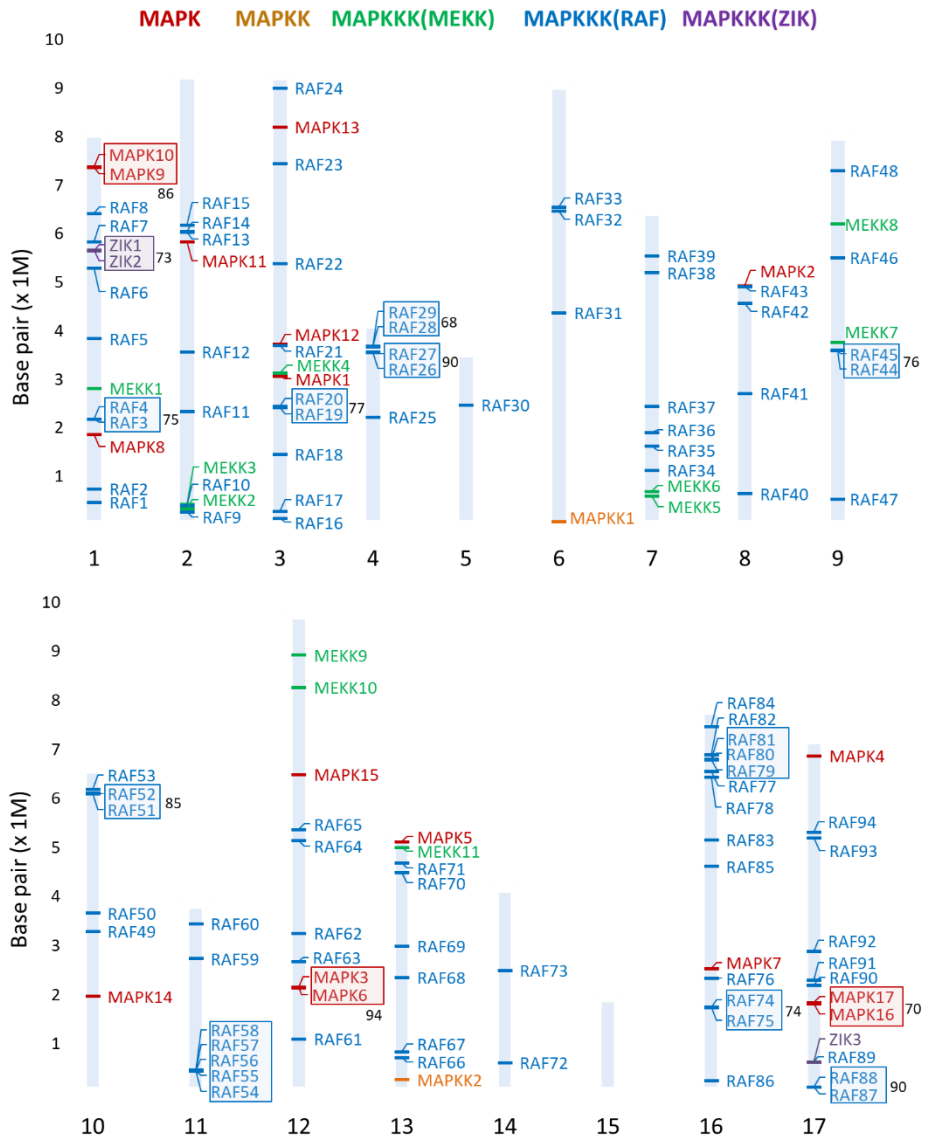

Figure S2

**Organism** Chlamydomonas reinhardtii  
**Transcript Name** Cre03.g177700.t1.1 (primary)  
**Location:** chromosome\_3:4693035..4696776 forward  
**Alias** g3674.t1 NIT2  
**Description** Transcription factor regulating nitrogen metabolism  
**Links** [B](#) [M](#) [CLIP](#)

[ditional Annotation](#) [Genomic](#) [Sequences](#) [Protein Homologs](#) [Gene Ancestry](#) [Variation](#) [Expression](#)

**Show:**  Expression  Coexpression

| Views                               | ID            | Define                                                                       | Correlation |
|-------------------------------------|---------------|------------------------------------------------------------------------------|-------------|
| <a href="#">G</a> <a href="#">B</a> | Cre43.g760647 |                                                                              | 0.946       |
| <a href="#">G</a> <a href="#">B</a> | Cre09.g393284 | RegA/RisA-like protein                                                       | 0.934       |
| <a href="#">G</a> <a href="#">B</a> | Cre01.g003800 | (1 of 105) 2.7.11.25 - Mitogen-activated protein kinase kinase kinase / MLTK | 0.934       |
| <a href="#">G</a> <a href="#">B</a> | Cre04.g217800 |                                                                              | 0.933       |
| <a href="#">G</a> <a href="#">B</a> | Cre14.g610000 | (1 of 1) K18633 - mitotic-spindle organizing protein 1 (MZT1, GIP1, GIP2)    | 0.932       |

Figure S3
